# Supplementary material
Source: publisher figshare collection journal article supplement (https://gsapubs.figshare.com/ndownloader/files/22745666)
Supplement: Supplementary file 1 [file 22745666]

Table DR1. Heat Production Data for the Southwestern United States\*

| Location                               | N <sup>†</sup> | A <sub>today</sub> <sup>§</sup> | A <sub>1.70 Ga</sub> <sup>#</sup> |
|----------------------------------------|----------------|---------------------------------|-----------------------------------|
|                                        |                | ( $\mu\text{W}/\text{m}^3$ )    | ( $\mu\text{W}/\text{m}^3$ )      |
| <u>Hualapai Block</u>                  |                |                                 |                                   |
| All                                    | 380            | 2.14                            | 3.12                              |
| Felsic intrusives                      | 196            | 2.69                            | 3.90                              |
| <u>Big Bug Block (northern)</u>        |                |                                 |                                   |
| All                                    | 53             | 0.96                            | 1.46                              |
| Felsic intrusives                      | 13             | 2.03                            | 3.11                              |
| <u>Big Bug Block (southern)</u>        |                |                                 |                                   |
| All                                    | 53             | 1.66                            | 2.51                              |
| Felsic intrusives                      | 38             | 2.03                            | 3.06                              |
| Crazy Basin and Horse Mtn intrusives** | 11             | 2.34                            | 3.46                              |
| <u>Ash Creek Block</u>                 |                |                                 |                                   |
| All                                    | 79             | 0.83                            | 1.27                              |
| Felsic intrusives                      | 31             | 0.92                            | 1.45                              |
| Cherry Creek Batholith                 | 9              | 0.67                            | 1.08                              |

\* U, Th and K data from Baedeker et al., 1998 and Dewitt written comm. 2003

<sup>†</sup> Number of samples

<sup>§</sup> Modern heat production computed from U, Th, K

<sup>#</sup> 1.7 Ga Heat production computed from U, Th, K

\*\* Intrusives with documented protracted cooling

<sup>††</sup> Intrusives with documented rapid cooling
